# Supplementary material for: sandbox – creating and analysing synthetic sediment sections with R
Source: Copernicus journal article supplement (doi:10.5194/gchron-4-323-2022), 2022-06-02
Supplement: Supplementary file 1 [file gchron-4-323-2022-supplement.zip]

Archive with 4 entries (4 files):
- gleina_grainsize_raw.txt
- gchron-4-323-2022-supplement-title-page.pdf
- SI_02.pdf
- gleina_interpolated.txt
