# Supplementary material for: sandbox – creating and analysing synthetic sediment sections with R
Source: Copernicus journal article supplement (doi:10.5194/gchron-4-323-2022), 2022-06-02
Supplement: Supplementary file 1 [file gchron-4-323-2022-supplement.zip › gchron-4-323-2022-supplement-title-page.pdf]

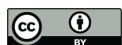

## *Supplement of* **sandbox – creating and analysing synthetic sediment sections with R**

**Michael Dietze et al.**

*Correspondence to:* Michael Dietze ([mdietze@gfz-potsdam.de](mailto:mdietze@gfz-potsdam.de))

- [gchron-4-323-2022-supplement-title-page.pdf](#)
- [SI\\_02.pdf](#)
- [gleina\\_grainsize\\_raw.txt](#)
- [gleina\\_interpolated.txt](#)

The copyright of individual parts of the supplement might differ from the article licence.
